# Supplementary material for: Work-focused cognitive–behavioural therapy and individual job support to increase work participation in common mental disorders: a randomised controlled multicentre trial
Source: PubMed Central journal article supplement — Occup Environ Med. 2015 Aug 10;72(10):745–52. doi: 10.1136/oemed-2014-102700 (PMC4602235; doi:10.1136/oemed-2014-102700), 2015-08-10
Supplement: oemed-2014-102700-s3.pdf [file oemed-2014-102700-s3.pdf]

**Supplementary table 1.** Treatment in AWaC, primary health care and labour market programs, by referral to treatment for all participants and sub-sample on long-term benefits

| Treatment                       | All participants |          |      |          | Sub-sample on Long term benefits |          |      |          |
|---------------------------------|------------------|----------|------|----------|----------------------------------|----------|------|----------|
|                                 | Control          |          | AWaC |          | Control                          |          | AWaC |          |
|                                 | Mean             | Std.dev. | Mean | Std.dev. | Mean                             | Std.dev. | Mean | Std.dev. |
| <i>AWaC:</i>                    |                  |          |      |          |                                  |          |      |          |
| Hours CBT                       |                  |          | 9.50 | 5.84     |                                  |          | 9.15 | 5.74     |
| Received Job Support            |                  |          | 0.32 |          |                                  |          | 0.47 |          |
| Hours Job Support a)            |                  |          | 5.22 | 5.85     |                                  |          | 6.20 | 6.88     |
| <i>Health care services: b)</i> |                  |          |      |          |                                  |          |      |          |
| Physician                       | 4.03             | 0.18     | 3.24 | 0.28     | 2.86                             | 0.41     | 2.10 | 0.23     |
| Psychologist                    | 6.68             | 0.35     | 2.00 | 0.83     | 5.37                             | 1.09     | 1.88 | 0.79     |
| Physiotherapist                 | 3.80             | 0.64     | 4.97 | 0.96     | 5.97                             | 1.60     | 5.87 | 1.96     |
| Chiropractor                    | 0.59             | 0.13     | 0.41 | 0.11     | 0.40                             | 0.22     | 0.54 | 0.21     |
| <i>Received LMP c)</i>          | 0.20             |          | 0.11 |          | 0.35                             |          | 0.20 |          |

a) Conditional on receiving job support.

b) Number of consultations, weighted by inverse probability weights obtained from logistic regression of response to follow-up, controlling for age, gender and scores above 8 on HAD scale for anxiety and depression.

c) Labour market programmes provided by NAV.

**Supplementary table 2.** Per person cost- and benefit components in the cost benefit analyses, all participants and sub sample on long-term benefits

|                                   | All     |              | On long-term benefits |              |
|-----------------------------------|---------|--------------|-----------------------|--------------|
|                                   | Control | AWaC         | Control               | AWaC         |
| Treatment costs:                  |         |              |                       |              |
| AWaC                              |         | 28043        |                       | 28043        |
| LMP                               | 10780   | 7182         | 22519                 | 18728        |
| Health services                   | 6020    | 2287         | 6020                  | 2287         |
| Sum:                              | 16800   | 37512        | 28539                 | 49058        |
| Benefit components: <sup>a)</sup> |         |              |                       |              |
| Social value of production        | 399 664 | 399 664      | 295 005               | 295 005      |
| Social value of leisure           | 76 496  | 76 496       | 48 269                | 48 269       |
| Reduction in public transfers     | 350 240 | 350 240      | 246 850               | 246 850      |
| Treatment effects:                |         |              |                       |              |
| Fully work                        |         | <b>0.044</b> |                       | <b>0.077</b> |
| Partly work                       |         | <b>0.024</b> |                       | <b>0.072</b> |
| Benefit per person                | 21173   | 21173        | 32317                 | 32317        |
| Net present benefit per person    | -3 681  | -3681        | 7694                  | 7694         |

a) Benefit components are based on annual earnings. Social value of production is before tax earnings plus social costs (covered by the employer).
