# Supplementary figures and images for: Work-focused cognitive–behavioural therapy and individual job support to increase work participation in common mental disorders: a randomised controlled multicentre trial
Source: PubMed Central journal article supplement — Occup Environ Med. 2015 Aug 10;72(10):745–52. doi: 10.1136/oemed-2014-102700 (PMC4602235; doi:10.1136/oemed-2014-102700), 2015-08-10

**Figure. Flowchart**

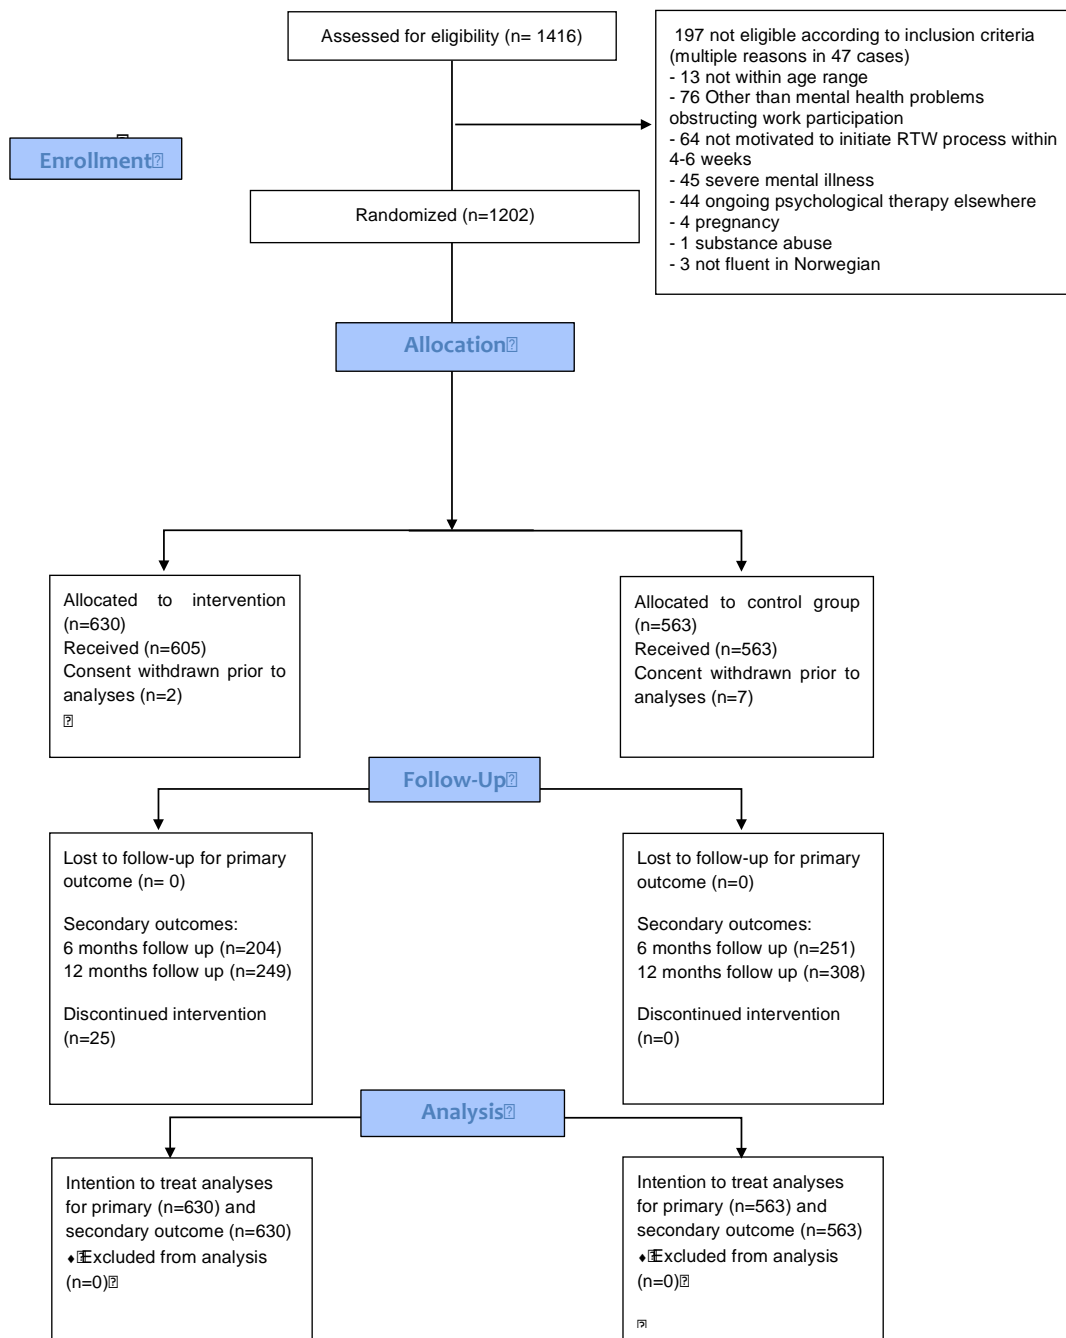

Supplement: oemed-2014-102700-s2.pdf [file oemed-2014-102700-s2.pdf]
